# Supplementary material for: A Non-interventional Clinical Trial Assessing Immune Responses After Radiofrequency Ablation of Liver Metastases From Colorectal Cancer
Source: PubMed Central journal article supplement (PMC6877671; doi:10.3389/fimmu.2019.02526), 2019-11-19
Supplement: Table_1.pdf [file Table_1.pdf]

**Supplementary Table 1: Patient characteristics**

Abbreviations: adeno: adenocarcinoma; Chx: chemotherapy; CR: complete remission; CRC: colorectal cancer; f: female; HLA: human leukocyte antigen; ID: initial diagnosis; LFU: last follow up; m: male; met.: metastasis; mo: months; MSI: microsatellite instable; MSS: microsatellite stable; n.a.: not applicable; n.d.: no data; OP: operation; RChx: radiochemotherapy; RFA: radiofrequency ablation; RTx: radiotherapy; Seg.: segment; SRG: surgery; TTR: time to relapse; w&w: watch and wait; UIICC: Union internationale contre le cancer.

Patients treated in the RFA + surgery group are shaded in light grey.

<sup>1</sup> age is provided at initial diagnosis.

| Patient IRISS # | Group         | Sex | Age <sup>1</sup> | Diagnosis   | MSI  | initial |   |   |   | UICC Stage (VIII) | Therapy before study inclusion             | Study inclusion   | # of liver lesions | Max. Diameter (RFA / surgery) (Liver Seg.) [mm]       | ID to SRG [mo] | RFA to SRG [days] | TTR [mo] | Site of relapse               | Re-currence at ablation site | Later Therapy     | LFU [mo] | Status at LFU |
|-----------------|---------------|-----|------------------|-------------|------|---------|---|---|---|-------------------|--------------------------------------------|-------------------|--------------------|-------------------------------------------------------|----------------|-------------------|----------|-------------------------------|------------------------------|-------------------|----------|---------------|
|                 |               |     |                  |             |      | T       | N | M | G |                   |                                            | UICC Stage (VIII) |                    |                                                       |                |                   |          |                               |                              |                   |          |               |
| 01              | RFA + Surgery | m   | 57               | CRC, adeno  | low  | 3       | 2 | 1 | 3 | IV                | Hemicolectomy<br>Chx<br>Hemihepatectomy    | IV                | 3                  | RFA: 23x23 (IV)<br>Surgery: 23x24 (I) & 20x19 (II)    | 19.8           | 34                | 3.0      | Liver                         | 0                            | Chx               | 3.0      | Relapse       |
| 05              | RFA + Surgery | m   | 69               | CRC, adeno  | MSS  | 3       | 1 | 1 | 2 | IV                | Hemicolectomy<br>RChx                      | IV                | 2                  | RFA: 18x9 (V)<br>Surgery: 25x17 (VII)                 | 32.6           | 22                | 9.6      | Brain                         | 0                            | n.d.              | 30.2     | Death         |
| 06              | RFA + Surgery | m   | 66               | CRC, adeno  | MSS  | 3       | 0 | 1 | 2 | IV                | Hemicolectomy<br>Chx<br>Chemo-embolisation | IV                | 3                  | RFA: 31x31 (IV)<br>Surgery: 32x25 (V) & 44x43 (VII)   | 12.5           | 54                | 5.6      | Liver                         | 0                            | RFA<br>Chx        | 48.5     | Relapse       |
| 07              | RFA + Surgery | m   | 47               | CRC, adeno  | MSS  | 3       | 2 | 1 | 3 | IV                | Proctocolectomy                            | IV                | 2                  | RFA: 25x25 (IV)<br>Surgery: 95x92 (IVa/VIII)          | 1.4            | 10                | 5.9      | Abdominal wall<br>Lymph nodes | 0                            | RTx<br>surgery    | 29.4     | Relapse       |
| 08              | RFA + Surgery | m   | 61               | CRC, adeno  | MSS  | 3       | 2 | 1 | 3 | IV                | Rectumresection                            | IV                | 2                  | RFA: 13x11 (IVa)<br>Surgery: 60x40 (VII)              | 1.9            | 30                | 3.2      | Liver                         | 0                            | RFA<br>Chx        | 43.1     | Relapse       |
| 09              | RFA + Surgery | m   | 77               | CRC, adeno  | n.d. | 3       | 1 | 1 | 2 | IV                | Hemicolectomy                              | IV                | 2                  | RFA: 28x22 (VII)<br>Surgery: 65x45 (VI)               | 2.9            | 38                | n.a.     | n.a.                          | 0                            | n.a.              | 124.2    | CR            |
| 10              | RFA + Surgery | m   | 45               | CRC, adeno  | MSS  | 2       | 1 | 0 | 2 | IIIA              | Rectumresection<br>RChx                    | IV                | 3                  | RFA: 17x18 (VI)<br>Surgery: 14x10 (I) & 13x13 (IVa)   | 13.5           | 29                | 14.7     | Liver                         | 0                            | Chx               | 31.7     | Death         |
| 11              | RFA + Surgery | m   | 77               | CRC, addeno | MSS  | 3       | 0 | 1 | 2 | IV                | Sigmaresection                             | IV                | 2                  | RFA: 12x12 (VIII)<br>Surgery: 25x17 (II)              | 2.0            | 21                | 44.0     | Liver, Lung                   | 0                            | n.d.              | 44.8     | Relapse       |
| 12              | RFA + Surgery | m   | 79               | CRC, adeno  | low  | 3       | 0 | 1 | 2 | IV                | Hemicolectomy                              | IV                | 3                  | RFA: 19x12 (IVa)<br>Surgery: 23x23 (VI) & 21x21 (VII) | 4.2            | 49                | 11.7     | Liver                         | 1                            | RFA<br>RFA<br>Chx | 80.8     | Death         |

| Patient IRISS # | Group   | Sex | Age <sup>1</sup> | Diagnosis  | MSI  | initial |   |   |   | UICC Stage (VIII) | Therapy before study inclusion         | Study inclusion UICC Stage (VIII) | # of liver lesions | Max. Diameter (RFA / surgery) (Liver Seg.) [mm]                                                 | ID to SRG [mo] | RFA to SRG [days] | TTR [mo] | Site of relapse | Re-currence at ablation site | Later Therapy  | LFU [mo] | Status at LFU |
|-----------------|---------|-----|------------------|------------|------|---------|---|---|---|-------------------|----------------------------------------|-----------------------------------|--------------------|-------------------------------------------------------------------------------------------------|----------------|-------------------|----------|-----------------|------------------------------|----------------|----------|---------------|
|                 |         |     |                  |            |      | T       | N | M | G |                   |                                        |                                   |                    |                                                                                                 |                |                   |          |                 |                              |                |          |               |
| 16              | Surgery | m   | 47               | CRC, adeno | MSS  | 3       | 2 | 1 | 2 | IV                | RTx<br>Rectumresection<br>adjuvant Chx | IV                                | 3                  | Surgery: 12x11 (VII), 14x14 (VIII) & 16x8 (VIII)                                                | 9.1            | n.a.              | 13.0     | Liver, Lung     | n.a.                         | n.d.           | 13.2     | Relapse       |
| 21              | Surgery | m   | 53               | CRC, adeno | MSS  | 1       | 1 | 1 | 3 | IV                | Chx<br>RFA                             | IV                                | 2                  | Surgery: 7x7 (VI) & 19x15 (VI)                                                                  | 24.9           | n.a.              | n.a.     | n.a.            | n.d.                         | 81.2           | n.d.     |               |
| 22              | Surgery | m   | 60               | CRC, adeno | MSS  | 2       | 0 | 1 | 2 | IV                | Chx<br>Hemicolectomy                   | IV                                | 1                  | Surgery: 21x17 (IVb)                                                                            | 9.7            | n.a.              | n.a.     | n.a.            | n.a.                         | 52.0           | CR       |               |
| 24              | Surgery | m   | 61               | CRC, adeno | MSS  | 3       | 1 | 0 | 2 | IIIB              | Hemicolectomy<br>Chx                   | IV                                | 2                  | Surgery: 20x21 (VI) & 35x30 (VI/VII)                                                            | 38.8           | n.a.              | 3.2      | Lung            | n.a.                         | w&w            | 19.5     | Relapse       |
| 26              | Surgery | m   | 56               | CRC, adeno | n.d. | 3       | 1 | 0 | 2 | IIIB              | Resection<br>Chx                       | IV                                | 7                  | Surgery: 18x18 (II), 7x7 (II), 18x18 (II/IV), 10x10 (V), 27x27 (VII), 10x10 (VIII) & 6x6 (VIII) | 18.1           | n.a.              | 3.5      | Liver           | n.a.                         | Chx<br>RFA     | 41.9     | Relapse       |
| 27              | Surgery | f   | 69               | CRC, adeno | MSS  | 1       | 0 | 0 | 2 | I                 | Hemicolectomy                          | IV                                | 1                  | Surgery: 40x35 (IVa)                                                                            | 24.2           | n.a.              | 11.3     | Liver           | n.a.                         | Chx<br>surgery | 34.0     | Death         |
| 28              | Surgery | f   | 62               | CRC, adeno | MSS  | 3       | 0 | 0 | 2 | IIA               | Hemicolectomy<br>Hemihepatectomy       | IV                                | 1                  | Surgery: 20x14 (II)                                                                             | 101.7          | n.a.              | 38.9     | Liver           | n.a.                         | n.d.           | 74.4     | Relapse       |
