# Supplementary material for: A Non-interventional Clinical Trial Assessing Immune Responses After Radiofrequency Ablation of Liver Metastases From Colorectal Cancer
Source: PubMed Central journal article supplement (PMC6877671; doi:10.3389/fimmu.2019.02526), 2019-11-19
Supplement: Table_2.pdf [file Table_2.pdf]

**Supplementary Table 2: Overview of selected individual peptides for immunological testing.**

Abbreviations: aa: amino acid; FC: fold change; HLA: human leukocyte antigen; ID: identifier; n.a.: not applicable; n.k.: not known.

**HLA class I:**

| Sequence    | Source protein | UniProt ID      | aa position | Mass [Da] | HLA  | SYFPEITHI  |                    | NetMHC     |                             | Evaluated in patient (UPN)    | FC value (log2)   | Frequency in CRC patients | Frequency in RFA patients | Involvement in cancer | Detected in patient | Detected by |
|-------------|----------------|-----------------|-------------|-----------|------|------------|--------------------|------------|-----------------------------|-------------------------------|-------------------|---------------------------|---------------------------|-----------------------|---------------------|-------------|
|             |                |                 |             |           |      | HLA allele | Relative score [%] | HLA allele | IC <sub>50</sub> score [nM] |                               |                   |                           |                           |                       |                     |             |
| TTDCLQILAY  | CTNNB1/PLAK    | P35222 / P14923 | 297-306     | 1139.55   | A*01 | A*01:01    | 87.2               | A*01:01    | 10                          | IRISS12                       | 2.6               | 0/35                      | 1/5                       | yes                   | IRISS12             | MS/MS       |
| DTDSAIGSFRY | DUS27          | Q5VZP5          | 888-898     | 1230.55   | A*01 | A*01:01    | 82.1               | A*01:01    | 9                           | IRISS05<br>IRISS09<br>IRISS12 | 4.8<br>4.8<br>4.2 | 2/35                      | 2/5                       | n.k.                  | IRISS05<br>IRISS12  | MS/MS       |
| PSENNKLTY   | VAMP7          | P51809          | 37-45       | 1964.51   | A*01 | A*01:01    | 75.0               | A*01:01    | 22                          | IRISS09                       | 1.3               | 3/35                      | 1/5                       | n.k.                  | IRISS12             | MS/MS       |
| VVIGNIGAL   | IFI6           | P09912          | 106-114     | 854.52    | A*02 | A*02:01    | 66.7               | A*02:50    | 48                          | IRISS08                       | 7.0               | 0/35                      | 1/5                       | n.k.                  | IRISS12             | MS/MS       |
| GLALKVQEV   | TENS4          | Q8IZW8          | 484-493     | 955.57    | A*02 | A*02:01    | 83.3               | A*02:50    | 2                           | IRISS05<br>IRISS08            | < 0<br>< 0        | 9/35                      | 1/5                       | yes                   | IRISS08             | MS/MS       |
| KYISGPHEL   | CENPF          | P49454          | 1271-1279   | 1042.54   | A*24 | A*24:02    | 77.4               | A*24:03    | 6                           | IRISS01                       | 4.2               | 2/35                      | 0/5                       | yes                   |                     | MS/MS       |
| IYFEYSHAF   | MSH3           | P20585          | 461-469     | 1175.53   | A*24 | A*24:02    | 71.0               | A*24:03    | 6                           | IRISS06                       | 2.5               | 0/35                      | 1/5                       | yes                   | IRISS06             | MS/MS       |
| VYFSKSEQL   | EPHA2          | P29317          | 574-582     | 1099.56   | A*24 | A*24:02    | 77.4               | A*24:03    | 11                          | IRISS01                       | 8.2               | 0/35                      | 0/5                       | yes                   |                     | MS/MS       |
| NYMPGQLTI   | MACC1          | Q6ZN28          | 394-402     | 1035.51   | A*24 | A*24:02    | 67.7               | A*24:03    | 6                           | IRISS01                       | 1.8               | 1/35                      | 0/5                       | yes                   |                     | MS/MS       |
| YYQDTPKQI   | NOP16          | Q9Y3C1          | 140-148     | 1154.56   | A*24 | A*24:02    | 71.0               | A*24:03    | 7                           | IRISS01                       | 2.0               | 2/35                      | 0/5                       | yes                   |                     | MS/MS       |
| VLKGGKLSL   | ERD21 / ERD22  | P24390 / P33947 | 202-210     | 984.67    | B*08 | B*08:01    | 86.1               | A*02:50    | 2                           | IRISS09                       | 1.6               | 3/35                      | 1/5                       | n.k.                  | IRISS12             | MS/MS       |
| VPKEKDEM    | KDM1A          | O60341          | 370-377     | 974.47    | B*08 | B*08:01    | 72.5               | B*08:01    | 1756                        | IRISS12                       | 7.4               | 0/35                      | 1/5                       | n.k.                  | IRISS12             | MS/MS       |
| TQRGALFLLF  | SRPX2          | Q60687          | 6-15        | 1164.67   | B*15 | B*15:01    | 63.6               | B*15:03    | 4                           | IRISS06                       | 1.8               | 2/53                      | 1/5                       | yes                   |                     | MS/MS       |
| QQMVVAHQY   | TENS3          | Q68CZ2          | 593-601     | 1102.52   | B*15 | B*15:01    | 81.5               | B*15:03    | 22                          | IRISS06                       | 2.0               | 0/35                      | 0/5                       | n.k.                  |                     | MS/MS       |
| DEFPGVRTY   | PGCA           | P16112          | 225-233     | 1082.50   | B*18 | B*18:01    | 78.8               | B*18:01    | 3                           | IRISS05<br>IRISS08            | 0.4<br>0.4        | 1/35                      | 2/5                       | n.k.                  | IRISS05<br>IRISS08  | MS/MS       |
| IRPNILVL    | SULF1 / SULF2  | Q8IWU6 / Q8IWU5 | 41-49       | 1049.7    | B*27 | B*27:05    | 71.1               | B*27:20    | 25                          | IRISS12                       | 1.3               | 9/35                      | 0/5                       | yes                   |                     | MS/MS       |
| AEIEADRSY   | LAMC2          | Q13753          | 837-845     | 1053.48   | B*44 | B*44:02    | 73.0               | B*44:03    | 8                           | IRISS01                       | 4.5               | 2/35                      | 0/5                       | yes                   |                     | MS/MS       |

HLA class II:

| Sequence                                  | Source protein | UniProt ID      | aa position         | Mass [Da] | HLA | Evaluated in patient (UPN)                          | FC value (log2)                 | Frequency in CRC patients | Frequency in RFA patients | Involvement in cancer | Detected in auto-logous tumor tissue | Detected by   |
|-------------------------------------------|----------------|-----------------|---------------------|-----------|-----|-----------------------------------------------------|---------------------------------|---------------------------|---------------------------|-----------------------|--------------------------------------|---------------|
| IPGYIVDDSVRVEQ                            | AREG           | P15514          | 93-106              | 1588.81   | DR  | IRISS05<br>IRISS06<br>IRISS08<br>IRISS09<br>IRISS12 | 2.7<br>2.7<br>2.7<br>2.2<br>2.2 | 3/19                      | 1/4                       | yes                   | IRISS12 (several length variants)    | MS/MS         |
| NPPAQYSWLIDGNIQQH                         | CEAM5          | P06731          | 442-458             | 2209.06   | DR  | IRISS01                                             | < 0                             | 0/19                      | 1/4                       | yes                   | IRISS12 (several length variants)    | MS/MS         |
| REGLIQWDKLLLTHTTE                         | GPA33          | Q99795          | 52-67               | 1951.05   | DR  | IRISS01<br>IRISS09                                  | 4.7<br>4.7                      | 0/19                      | 1/4                       | yes                   | IRISS01 (several length variants)    | MS/MS         |
| YELQYYEKE                                 | EPHB2          | P29323          | 469-477             | 1263.57   | DR  | IRISS12                                             | 7.4                             | 0/19                      | 14                        | yes                   | IRISS12 (several length variants)    | MS/MS         |
| DPKFITSILYENNVITI                         | EPCAM          | P16422          | 177-193             | 1979.06   | DR  | IRISS01<br>IRISS06<br>IRISS08<br>IRISS09            | 3.7<br>3.9<br>3.9<br>3.7        | 0/19                      | 1/4                       | yes                   | IRISS01 (several length variants)    | MS/MS         |
| VSVYALKDTLTSRPA                           | FN1            | P02751          | 1789-1804           | 1619.89   | DR  | IRISS05                                             | 3.4                             | 0/19                      | 0/4                       | yes                   |                                      | MS/MS         |
| DTLTSRPAQGVVTTL                           | FN1            | P02751          | 1797-1811           | 1343.70   | DR  | IRISS09<br>IRISS12                                  | 2.8                             | 0/19                      | 1/4                       | yes                   | IRISS12                              | MS/MS         |
| NPPSMVAAGSVVAAV                           | CCND1          | P24385          | 198-212             | 1254.66   | DR  | IRISS01<br>IRISS05<br>IRISS08                       | 0.9<br>1.1<br>1.2               | 1/19                      | 3/4                       | yes                   | IRISS01<br>IRISS05<br>IRISS08        | MS/MS         |
| VYIF <b>PG</b> QPASILGGS<br>(Gene fusion) | MAOM-SMAD4     | P23368 / Q13485 | 468-473;<br>224-232 | 1504.79   | DR  | IRISS12                                             | < 0                             | n.a.                      | 1/4                       | yes                   | IRISS12 (fusion)                     | WTS predicted |
| TLPLPNLRLVVRGTQV<br>(Mutation V104L)      | mERBB3         | P21860          | 96-110              | 1676.01   | DR  | IRISS06                                             | n.a.                            | n.a.                      | 1/4                       | yes                   | IRISS06 mutation                     | WTS predicted |
| TLPLPNLRVVRGTQV<br>(Wildtype)             | ERBB3          | P21860          | 96-110              | 1661.99   | DR  | IRISS06                                             | n.a.                            | n.a.                      | n.a.                      | yes                   | corresponding wildtype peptide       | MS/MS         |
