# Supplementary material for: A Non-interventional Clinical Trial Assessing Immune Responses After Radiofrequency Ablation of Liver Metastases From Colorectal Cancer
Source: PubMed Central journal article supplement (PMC6877671; doi:10.3389/fimmu.2019.02526), 2019-11-19
Supplement: Table_3.pdf [file Table_3.pdf]

**Supplementary Table 3: Selection of HLA class I peptides for identification of potential candidate antigens for immune analyses.**

A detailed description of the different selection steps can be found in figure 2 (exemplified for patient IRISS 12).

| UPN             | HLA class I peptides |        |        |        |        |        |        |        | Selection rate [%] |
|-----------------|----------------------|--------|--------|--------|--------|--------|--------|--------|--------------------|
|                 | Step 0               | Step 1 | Step 2 | Step 3 | Step 4 | Step 5 | Step 6 | Step 7 |                    |
| <b>IRISS 01</b> | 1785                 | 1508   | 552    | 521    | 260    | 237    | 237    | 181    | 10                 |
| <b>IRISS 05</b> | 260                  | 198    | 25     | 27     | 8      | 7      | 5      | 3      | 1                  |
| <b>IRISS 06</b> | 711                  | 666    | n.d.   | 438    | 69     | 46     | 44     | 33     | 5                  |
| <b>IRISS 08</b> | 231                  | 175    | 26     | 17     | 10     | 9      | 9      | 2      | 1                  |
| <b>IRISS 09</b> | 136                  | n.d.   | n.d.   | n.d.   | n.d.   | n.d.   | n.d.   | n.d.   | n.d.               |
| <b>IRISS 12</b> | 1887                 | 1714   | 886    | 799    | 485    | 400    | 399    | 293    | 16                 |

Abbreviations:

n.d.: not determined; UPN: uniform patient number.
