# Supplementary material for: A Non-interventional Clinical Trial Assessing Immune Responses After Radiofrequency Ablation of Liver Metastases From Colorectal Cancer
Source: PubMed Central journal article supplement (PMC6877671; doi:10.3389/fimmu.2019.02526), 2019-11-19
Supplement: Table_4.pdf [file Table_4.pdf]

**Supplementary Table 4: Selection of HLA class II peptides for identification of potential candidate antigens for immune analyses.**

A detailed description of the different selection steps can be found in figure 3 (exemplified for patient IRISS 12).

| UPN             | HLA class II peptides |        |        |        |        |        | Selection rate [%] |
|-----------------|-----------------------|--------|--------|--------|--------|--------|--------------------|
|                 | Step 0                | Step 1 | Step 2 | Step 3 | Step 4 | Step 5 |                    |
| <b>IRISS 01</b> | 850                   | 143    | 132    | 117    | 89     | 84     | 10                 |
| <b>IRISS 05</b> | 556                   | 427    | 394    | 387    | 299    | 284    | 51                 |
| <b>IRISS 06</b> | 7                     | n.d.   | n.d.   | n.d.   | n.d.   | n.d.   | n.d.               |
| <b>IRISS 08</b> | 220                   | 86     | 68     | 57     | 51     | 51     | 23                 |
| <b>IRISS 09</b> | 17                    | n.d.   | n.d.   | n.d.   | n.d.   | n.d.   | n.d.               |
| <b>IRISS 12</b> | 1461                  | 764    | 610    | 610    | 513    | 509    | 35                 |

Abbreviations:

n.d.: not determined; UPN: uniform patient number.
